# Supplementary material
Source: ML conference proceedings conference paper supplement (https://openaccess.thecvf.com/content/ICCV2023/html/Zhao_Learning_Semi-supervised_Gaussian_ICCV_2023_paper.html)
Supplement: Supplementary file 1 [file Zhao_Learning_Semi-supervised_Gaussian_ICCV_2023_supplemental.zip]

Archive with 2 entries (2 files):
- 06078-supp.pdf
- __MACOSX/._06078-supp.pdf
